# Supplementary material
Source: Research Square preprint supplement (doi:10.21203/rs.3.rs-9312593/v1)
Supplement: Supplementary file 1 [file 2596b15b5d4afe80f473417f.docx]

# Supplementary Information

## Supplementary Tables 1–3: benchmarking analyses for the university hospital’s current fall-risk assessment categories.

We evaluated the university hospital's fall risk assessment, which categorizes patients as "0" (no increased risk of falling), "+", or "++". These analyses are restricted to admissions with an available hospital fall-risk assessment score and complete benchmark variables, which explains the smaller sample size relative to the full analytic cohort. Using logistic regression with a 90%/10% train-test split, the regression coefficients and model statistics are shown in Supplementary Table 1. Supplementary Table 2 displays odds ratios, 95% confidence intervals, LLR p-value, and pseudo R-squared. Patients with a "+" score are over four times (OR 4.17) and "++" score over six times (OR 6.31) more likely to fall than those scored "0".

**Supplementary Table 1**. Results of logistic regression with fall incidents as DV and the university hospital's fall risk assessment as IV

| No. Observations: 511.551 LLR p-value: 0.000 | | | | Pseudo R-squ.: 0.07142 Log-Likelihood: -31983. | | |
| --- | --- | --- | --- | --- | --- | --- |
|  | coef | std err | z | P >|z| | [0.025 | 0.975] |
| const | -3.8824 | 0.103 | -37.654 | 0.000 | -4.085 | -3.680 |
| 0 | -1.4846 | 0.106 | -13.978 | 0.000 | -1.693 | -1.276 |
| + | 0.2461 | 0.104 | 2.361 | 0.018 | 0.042 | 0.451 |
| ++ | 1.2958 | 0.113 | 11.449 | 0.000 | 1.074 | 1.518 |

**Supplementary Table 2.** Odds Ratios and Associated Metrics for Fall Risk Assessment Categories at the University Hospital

| ***Feature*** | ***OR*** | ***p-value*** | ***2.5%*** | ***97.5%*** | ***LLR p-value*** | ***Pseudo R-squared*** |
| --- | --- | --- | --- | --- | --- | --- |
| 0 (no increased risk of falling) | 0.17 | 0.0 | 0.160 | 0.178 | 0.000 | 0.065 |
| **+** (increased risk of falling) | 4.17 | 0.0 | 3.971 | 4.384 | 0.000 | 0.045 |
| **++** (significantly increased risk of falling) | 6.31 | 0.0 | 5.766 | 6.905 | 0.000 | 0.014 |

Supplementary Table A provides an overview when oversampling for the training sets, so there are no longer any imbalances and then computing a logistic regression.

**Supplementary Table 3.** Results of logistic regression as modeled in Table B1 except for oversampling

|  | ***Precision*** | ***Recall*** | ***F1-Score*** | ***Support*** |
| --- | --- | --- | --- | --- |
| 0.0 | 0.99 | 0.66 | 0.79 | 56133 |
| 1.0 | 0.03 | 0.73 | 0.05 | 707 |
| Accuracy |  |  | 0.66 | 56840 |
| Macro avg | 0.51 | 0.69 | 0.42 | 56840 |
| Weighted avg | 0.98 | 0.66 | 0.78 | 56840 |
| F1 Score: 0.05; AUC: 0.69 | | | | |

# Supplementary Tables 4–5: most common diagnoses & procedures

The most common procedures for fallen and non-fallen patients are shown in Supplementary Table 4, and the most common diagnoses are shown in Supplementary Table 5.

**Supplementary Table 4** Most common procedures for fallen and non-fallen patients

| ***Fallen Patients*** | | ***Non-fallen Patients*** | |
| --- | --- | --- | --- |
| **Procedure group** | **Quan. (%)** | **Procedure group** | **Quan. (%)** |
| Computer Tomography CT | 17,326 (16.33) | Computer Tomography CT | 607,914 (15.07) |
| Circulatory Measures | 13,227 (12.47) | Circulatory Measures | 413,399 (10.25) |
| Radiotherapy, nuclear medical therapy, and chemotherapy | 6,260 (5.90) | Radiotherapy, nuclear medical therapy, and chemotherapy | 260,039 (6.45) |
| Patient monitoring | 5,610 (5.29) | Examination of individual body systems | 222,475 (5.51) |
| Treatment for mental and psychosomatic, and behavioral disorders in adults | 5,170 (4.87) | Surgeries on the locomotor organs | 188,950 (4.68) |

**Supplementary Table 5** Most common diagnoses for fallen and non-fallen patients

| ***Fallen Patients*** | | ***Non-fallen Patients*** | |
| --- | --- | --- | --- |
| **Diagnosis group** | **Quan. (%)** | **Diagnosis group** | **Quan. (%)** |
| Forms of heart disease | 5,339 (5.35) | Potential health risks based on family/personal history | 413,035 (5.36) |
| Metabolic disorders | 5295 (5.31) | Forms of heart disease | 338,275 (4.39) |
| Potential health risks based on family/personal history | 4,197 (4.21) | Metabolic disorders | 321,760 (4.17) |
| Hypertension | 3,184 (3.19) | Hypertension | 258,783 (3.36) |
| Diseases of the muscles | 2,812 (2.82) | Persons using the health care system for the purpose of specific measures and medical care | 171,177 (2.22) |

## Supplementary Fig. 1: Global risk factors and SHAP explanations

For the L3 model chosen, we examined the aggregated local feature importances using SHAP. Fig. D1 is a SHAP summary plot for the top features contributing to fall risk. Each point in Fig. D1 represents a patient; points are plotted horizontally by SHAP value, i.e., the impact on model output, and are colored by the feature value (e.g., for age: red = older, blue = younger). Fall history (number of falls in the 12 months before admission) emerged as the single most influential predictor. Some nursing features and procedural codes were particularly notable. E.g., early rehabilitative and physical therapy procedures (OPS 8-55) showed that patients in rehabilitation therapy often had higher fall risk. This likely reflects confounding by procedure—these patients are in rehabilitation because of mobility impairments, which also put them at risk of falling.

High-risk medications and comorbidities also appeared. For instance, the model included features for psychotropic medication use, captured indirectly via procedure code “application of medications” (OPS 6-00) and diagnoses like depression or dementia. Male sex had a small positive SHAP on average, consistent with the slight male excess in fallers, though sex was far less important than age or medical factors. Hypertension (ICD I10-I15) and metabolic disorders (ICD E70-E90) had nuanced effects—they were common in both fallers and non-fallers, so on average they weren’t among the very top predictors, but in combination with other factors they sometimes elevated risk, for example, a patient with hypertension plus balance issues might be at risk due to orthostatic hypotension from antihypertensive medication. Overall, the SHAP summary indicates that our model’s predictions are driven by a mix of direct fall risk indicators, such as prior falls, age, mobility impairments, and indirect proxies of vulnerability, such as complex treatment courses and need for monitoring.


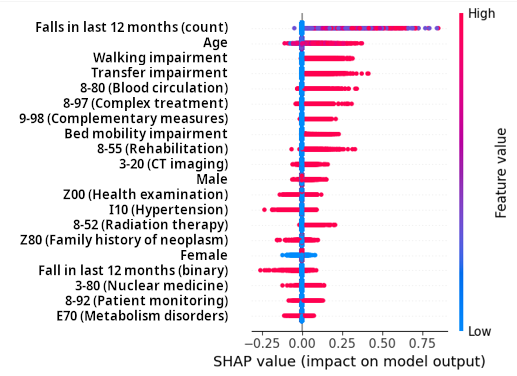
**Supplementary Fig. 1** SHAP summary plot of top 20 features for fall risk prediction. The features are ranked by mean absolute SHAP value, i.e. the largest average magnitude of contribution to the model output, regardless of direction. Points to the right indicate that the feature increases fall risk, to the left decreases risk. Color indicates the feature value, i.e., red for high, blue for low. For continuous features like age, red means older age. For categorical features (procedures, diagnoses), red indicates presence of that code, blue indicates absence.

## Supplementary Note: detailed cluster description

**Cluster 1: “Miscellaneous High Care Needs”**—Cluster 1 was the largest cluster (23% of cases) and appears to represent a general high-dependency group without a single defining specialty. This cluster seems to be patients who are generally of high acuity or dependency (perhaps needing help with basic care) but not fitting one of the more specific profiles.

**Cluster 2: “Complex Care—Younger, Multi-system”**—Cluster 2 patients required high levels of care despite being relatively younger with a mean of 61.2 years, a younger cluster. They had frequent recent falls, complex care needs, and often had circulatory system procedures, and frequent CT imaging. This paints a picture of patients with serious illnesses, such as trauma or severe chronic diseases that necessitate intensive interventions.

**Cluster 3: “Behavioral Abnormality”—**This was a relatively small cluster of patients with mental health and psychosomatic disorders as dominant features. They tended to be younger (average ~64 years) and more often female (only 31% male). These patients often had psychiatric conditions or delirium contributing to falls.

**Cluster 4: “Frail & Rehabilitation-Focused”**—Patients in Cluster 4 were generally very elderly and frail. This cluster had the highest average age (87.3 years). Key features included a history of multiple falls (high SHAP for “falls in last 12 months”), early rehabilitation and physical therapy orders, and mobility impairments (difficulty walking/transferring). In essence, Cluster 4 represents geriatric patients with severe mobility limitation and general frailty.

**Cluster 5: “Complex Treatments”**—Cluster 5 patients were those undergoing highly complex medical/surgical treatments, often in intensive or step-down care. Their average age was ~77.8 years, and 57% were male. They frequently had multiple recent procedures; the standout feature was OPS 8-97/8-98 “complex treatment,” which is ICU care or complex surgery. They also had elevated fall risk from a recent fall history and were often hypertensive.

**Cluster 6: “Complex Treatments with Metabolic Component”**—Patients in Cluster 6 were similar to Cluster 5 but with an added profile of metabolic disorders, particularly diabetes. Average age was ~81.8 (slightly older than Cluster 5), 64% male. They had the highest frequency of “complex treatment” codes of any cluster, indicating many were receiving invasive procedures or intensive therapies. They also often had gait or transfer impairments noted and hypertension, but a distinguishing factor was the presence of metabolic disease codes in their top features. Many of these patients were diabetics with complications, or other metabolic issues like electrolyte imbalances or obesity.

**Cluster 7: “Oncology & Circulatory Interventions”**—Cluster 7 consisted of patients with active cancer treatments and other major medical interventions. Average age 64.9, 50% male. The salient features include measures for blood circulation (OPS 8-80 to 8-85) and radiation/chemotherapy procedures (OPS 8-52 to 8-54). This indicates many were oncology patients receiving chemo or radiotherapy, often with concurrent cardiovascular procedures. They also frequently had “application of medications” codes (6-00). These patients likely fall because of treatment side effects: chemotherapy can cause neuropathy, fatigue, anemia; radiation can cause weakness; extensive diagnostic tests mean they are in unfamiliar environments often.

**Cluster 8: “Frequent Monitoring**”—Cluster 8 included patients around 84.5 years old on average. They were characterized by continuous monitoring procedures, prior falls, hypertension, and broader health-risk history. This pattern is consistent with medically complex patients under close cardiac or neurological surveillance.

**Cluster 9: “Rehabilitation with Specialized Therapy (Phoniatric)**”—Cluster 9 patients share features with Cluster 4 (early rehab, walking/transfer impairments) but also have phoniatric and audiology therapy in their profile. This suggests patients who are in rehabilitation settings and also receiving speech or hearing therapy—possibly stroke patients or others with neurological deficits affecting speech/swallow. They also have complex care needs.

## Supplementary Table 6 and Supplementary Fig. 2: cluster-level descriptions

For each clustering method and each resulting cluster, we report cluster size (*n*), number of falls, observed fall incidence with 95% Wilson confidence interval, and mean predicted fall risk. Clusters are identified by the method-specific cluster label (C0, C1, …). If a minimum cluster-size rule is applied (e.g., <1%), this is reflected in *keffective* as reported in Table 3.

**Supplementary Table 6** Cluster-level outcomes in the high-risk evaluation cohort (alert threshold p≥0.08)

| **Method** | **Cluster** | **n (patients)** | **% of cohort** | **n (Falls)** | **Observed incidence** | **95% Wilson CI** | **Mean predicted risk** | **SD predicted risk** |
| --- | --- | --- | --- | --- | --- | --- | --- | --- |
| SHAP_KMeans | 0 | 1604 | 17.55 | 212 | 0.13 | [0.12, 0.15] | 0.15 | 0.11 |
| SHAP_KMeans | 2 | 272 | 2.98 | 28 | 0.10 | [0.07, 0.14] | 0.15 | 0.09 |
| SHAP_KMeans | 5 | 93 | 1.02 | 49 | 0.53 | [0.43, 0.63] | 0.44 | 0.28 |
| SHAP_KMeans | 6 | 143 | 1.56 | 43 | 0.30 | [0.23, 0.38] | 0.27 | 0.11 |
| SHAP_KMeans | 7 | 340 | 3.72 | 91 | 0.27 | [0.22, 0.32] | 0.30 | 0.24 |
| SHAP_KMeans | 8 | 6583 | 72.03 | 1010 | 0.15 | [0.14, 0.16] | 0.16 | 0.13 |
| RAW_KMeans | 0 | 1892 | 20.70 | 302 | 0.16 | [0.14, 0.18] | 0.15 | 0.13 |
| RAW_KMeans | 1 | 525 | 5.74 | 84 | 0.16 | [0.13, 0.19] | 0.16 | 0.10 |
| RAW_KMeans | 2 | 1221 | 13.36 | 192 | 0.16 | [0.14, 0.18] | 0.15 | 0.09 |
| RAW_KMeans | 3 | 2089 | 22.86 | 268 | 0.13 | [0.11, 0.14] | 0.17 | 0.15 |
| RAW_KMeans | 4 | 2263 | 24.76 | 305 | 0.13 | [0.12, 0.15] | 0.16 | 0.09 |
| RAW_KMeans | 6 | 672 | 7.35 | 224 | 0.33 | [0.30, 0.37] | 0.29 | 0.26 |
| RAW_KMeans | 7 | 133 | 1.46 | 20 | 0.15 | [0.10, 0.22] | 0.15 | 0.09 |
| RAW_KMeans | 8 | 307 | 3.36 | 54 | 0.18 | [0.14, 0.22] | 0.22 | 0.09 |
| RAW_GMM | 0 | 1896 | 20.75 | 300 | 0.16 | [0.14, 0.18] | 0.15 | 0.12 |
| RAW_GMM | 1 | 518 | 5.67 | 82 | 0.16 | [0.13, 0.19] | 0.16 | 0.10 |
| RAW_GMM | 2 | 1218 | 13.33 | 190 | 0.16 | [0.14, 0.18] | 0.15 | 0.09 |
| RAW_GMM | 3 | 2088 | 22.85 | 267 | 0.13 | [0.11, 0.14] | 0.17 | 0.15 |
| RAW_GMM | 4 | 2243 | 24.54 | 302 | 0.13 | [0.12, 0.15] | 0.16 | 0.09 |
| RAW_GMM | 6 | 699 | 7.65 | 234 | 0.33 | [0.30, 0.37] | 0.29 | 0.26 |
| RAW_GMM | 7 | 133 | 1.46 | 20 | 0.15 | [0.10, 0.22] | 0.15 | 0.09 |
| RAW_GMM | 8 | 307 | 3.36 | 54 | 0.18 | [0.14, 0.22] | 0.22 | 0.09 |
| PCA_KMeans | 0 | 767 | 8.39 | 128 | 0.17 | [0.14, 0.19] | 0.17 | 0.10 |
| PCA_KMeans | 2 | 1570 | 17.18 | 239 | 0.15 | [0.14, 0.17] | 0.16 | 0.09 |
| PCA_KMeans | 3 | 2143 | 23.45 | 271 | 0.13 | [0.11, 0.14] | 0.17 | 0.15 |
| PCA_KMeans | 4 | 1727 | 18.90 | 278 | 0.16 | [0.14, 0.18] | 0.15 | 0.13 |
| PCA_KMeans | 7 | 2145 | 23.47 | 289 | 0.13 | [0.12, 0.15] | 0.16 | 0.09 |
| PCA_KMeans | 8 | 695 | 7.60 | 230 | 0.33 | [0.30, 0.37] | 0.28 | 0.26 |
| RAW_Ward | 0 | 2055 | 22.49 | 384 | 0.19 | [0.17, 0.20] | 0.22 | 0.21 |
| RAW_Ward | 1 | 2348 | 25.69 | 362 | 0.15 | [0.14, 0.17] | 0.16 | 0.09 |
| RAW_Ward | 2 | 149 | 1.63 | 18 | 0.12 | [0.08, 0.18] | 0.15 | 0.09 |
| RAW_Ward | 4 | 1744 | 19.08 | 316 | 0.18 | [0.16, 0.20] | 0.16 | 0.15 |
| RAW_Ward | 5 | 2446 | 26.76 | 335 | 0.14 | [0.12, 0.15] | 0.15 | 0.09 |
| RAW_Ward | 7 | 357 | 3.91 | 35 | 0.10 | [0.07, 0.13] | 0.15 | 0.11 |
| RAW_Spectral | 0 | 149 | 1.63 | 22 | 0.15 | [0.10, 0.21] | 0.17 | 0.13 |
| RAW_Spectral | 1 | 1949 | 21.33 | 461 | 0.24 | [0.22, 0.26] | 0.21 | 0.21 |
| RAW_Spectral | 3 | 106 | 1.16 | 15 | 0.14 | [0.09, 0.22] | 0.16 | 0.09 |
| RAW_Spectral | 4 | 438 | 4.79 | 82 | 0.19 | [0.15, 0.23] | 0.17 | 0.13 |
| RAW_Spectral | 5 | 154 | 1.69 | 17 | 0.11 | [0.07, 0.17] | 0.18 | 0.15 |
| RAW_Spectral | 6 | 4707 | 51.50 | 687 | 0.15 | [0.14, 0.16] | 0.16 | 0.10 |
| RAW_Spectral | 7 | 1085 | 11.87 | 98 | 0.09 | [0.07, 0.11] | 0.16 | 0.12 |
| RAW_Spectral | 8 | 513 | 5.61 | 64 | 0.12 | [0.10, 0.16] | 0.17 | 0.13 |
| RiskBin | 0 | 8725 | 95.47 | 1111 | 0.13 | [0.12, 0.13] | 0.14 | 0.07 |
| RiskBin | 3 | 94 | 1.03 | 75 | 0.80 | [0.71, 0.87] | 0.68 | 0.02 |

**Notes**: Clusters <1% were collapsed for reporting (excluded from the method-level separation metrics), so the effective number of clusters (*keffective*) may be <9. Observed incidence is computed on the held-out evaluation cohort (alerts at p≥0.08), and Wilson CIs are reported for binomial proportions. Mean predicted risk is the model’s mean predicted probability within each cluster.

## Supplementary Fig. 2 visualizes the same cluster-level outcomes (observed incidence with 95% Wilson CI and mean predicted risk), highlighting the stronger outcome gradient for SHAP-space clustering.


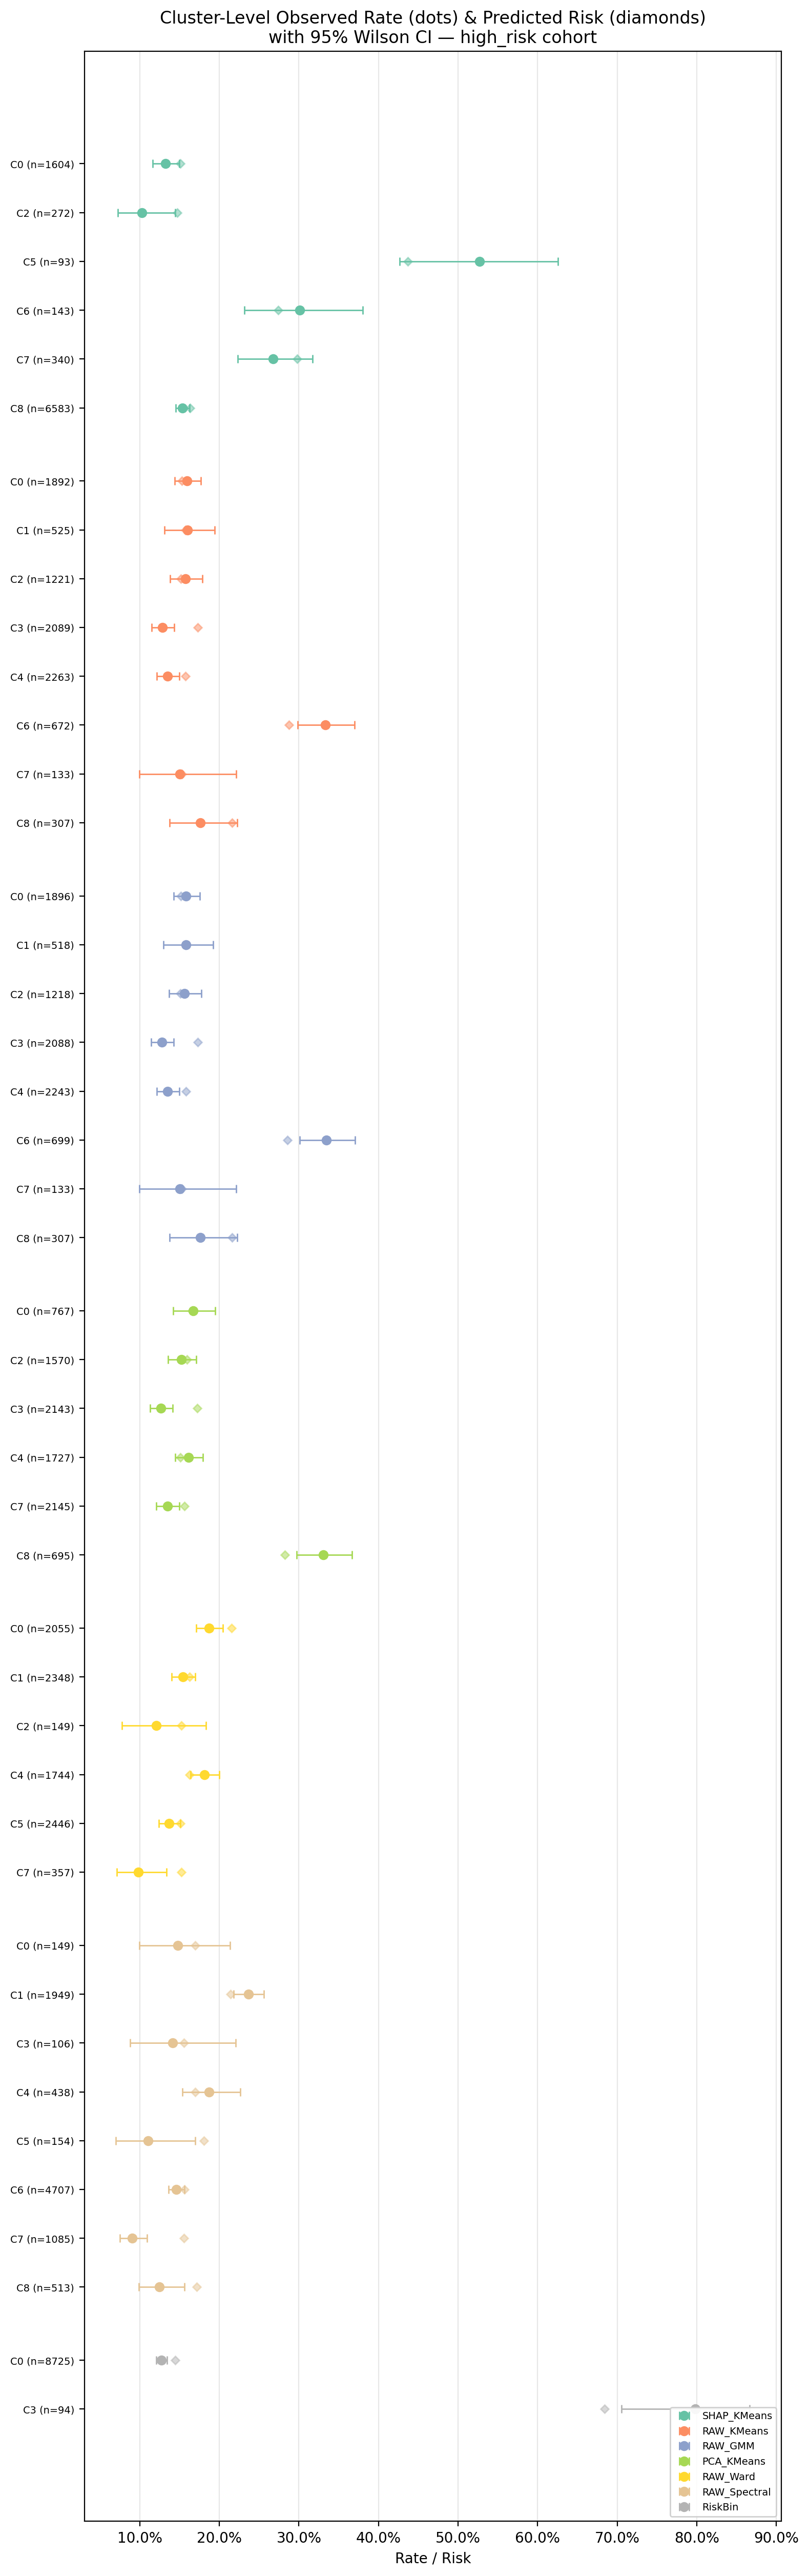


**Supplementary Fig. 2** Cluster-level observed fall incidence (dots, 95% Wilson CI) and mean predicted risk (diamonds) in the high-risk cohort (p≥0.08).
